# Supplementary material
Source: PubMed Central journal article supplement (PMC2575176)

## **SUPPLEMENTAL FIGURE LEGENDS**

**Supplemental Figure 1.** Depletion of Orc1 does not block Skp2-induced G2 arrest.

WM115 cells were transfected with control siRNA, Skp2 #13 siRNA alone or Skp2 plus Orc1 siRNA (GAACAGGAAUCCAAGACAUU) for 6 days. (A) Cells were lysed and lysates analyzed by Western blotting for Skp2, Orc1 and ERK1/2 (loading). (B) Cells were stained with propidium iodide and analyzed by FACS. (C) The average percent and s.d. of cells in G0/G1, S, 4N and polyploid (8N) phases of the cell cycle from three independent experiments.

**Supplemental Figure 2.** Expression of 3A-cyclin B1 blocks Skp2

knockdown-induced G2/M arrest.

WM115-TR-WT-cyclin B1 and WM115-TR-3A-cyclin B1 cells were transfected with control or Skp2 #13 siRNA for 6 days in the presence or absence of 0.1 µg/ml doxycycline. Cells were stained with propidium iodide and analyzed by FACS. Representative propidium iodide profiles are shown.

**Supplemental Figure 3.** Use of a second p53 siRNA to reverse effects of Skp2 depletion on G2/M arrest.

WM115 cells were transfected with control siRNA, Skp2 #13 siRNA alone, p53 siRNA (duplex #6, CAGUCUACCUCCCGCCAUAUU) alone, or Skp2 plus p53 siRNA for 6 days. (A) Cells were lysed and lysates analyzed by Western blotting for p53, p27<sup>Kip1</sup>, and ERK1/2. (B) Cells were stained with propidium iodide and

analyzed by FACS. Representative profiles are shown and the average percent of 4N cells from three independent experiments is indicated.

**A**

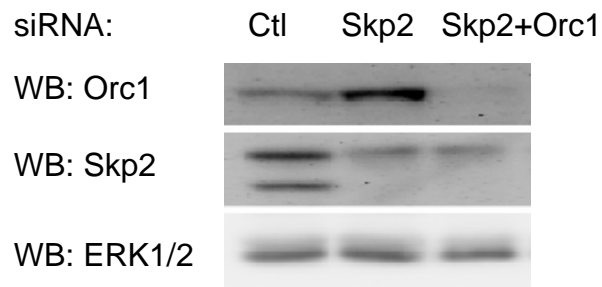

**B**

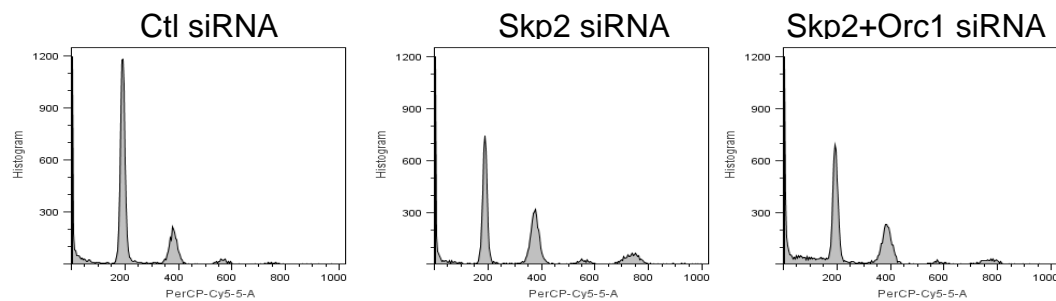

**C**

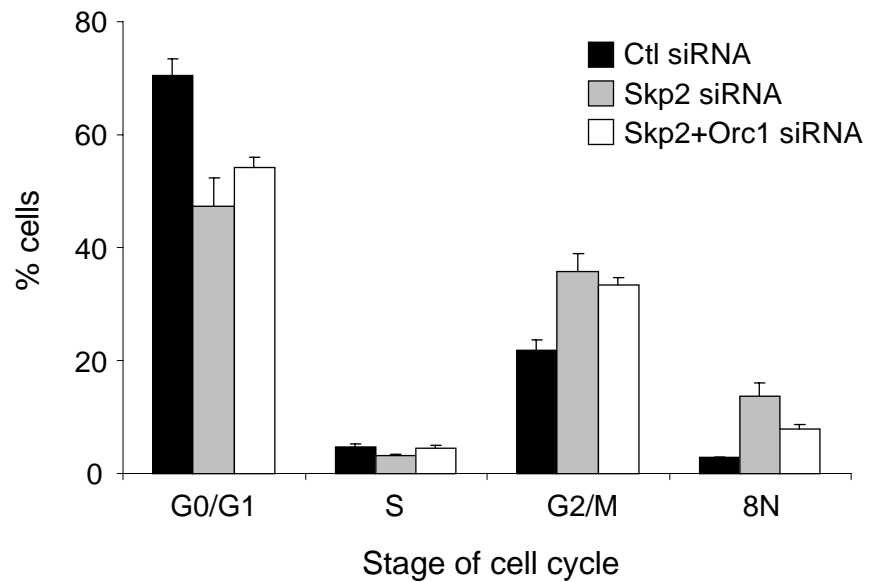

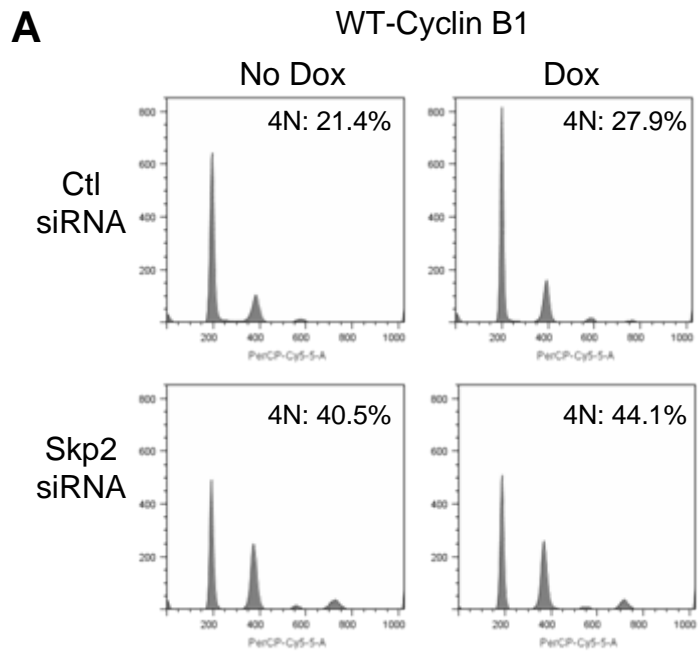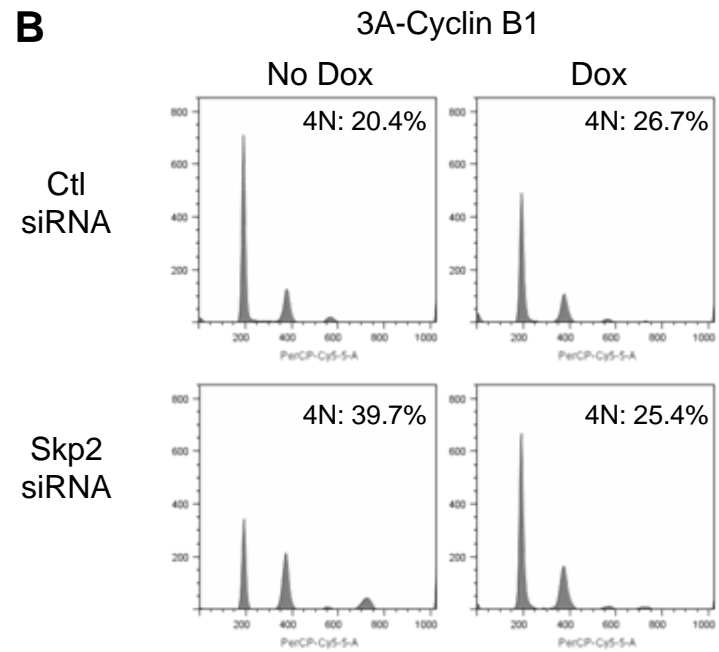

**A**

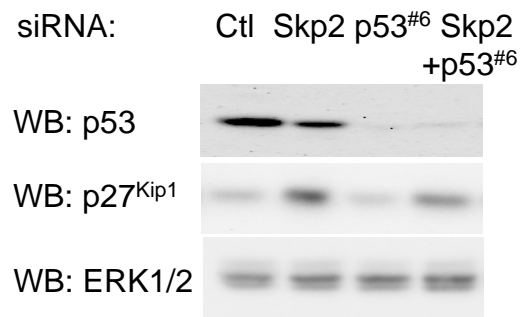

**B**

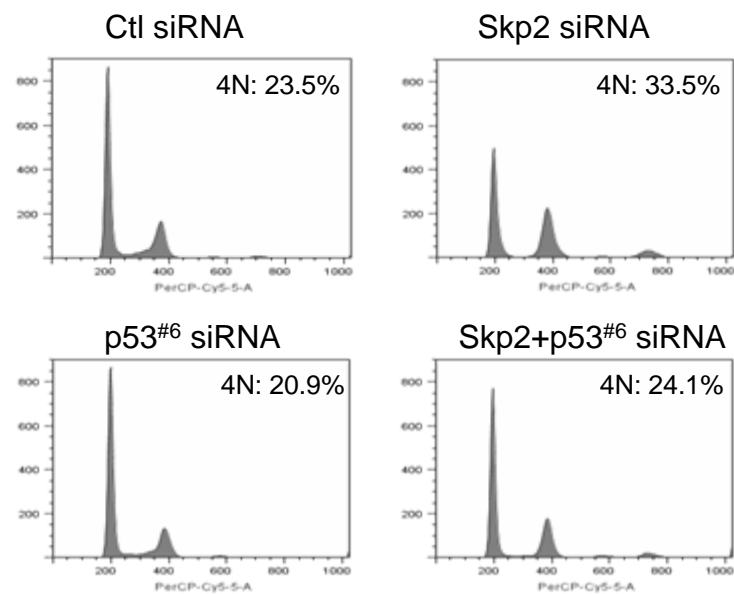

Supplement: E07-11-1137_1.pdf [file E07-11-1137_1.pdf]
